# Supplementary material for: High resolution spatial mapping of brominated pyrrole-2-aminoimidazole alkaloids distributions in the marine sponge Stylissa flabellata via MALDI-mass spectrometry imaging
Source: Royal Society of Chemistry journal article supplement (doi:10.1039/c2mb25152c), 2012-06-13
Supplement: c2mb25152c.pdf [file c2mb25152c.pdf]

# SUPPORTING INFORMATION

## High resolution spatial mapping of brominated pyrrole-2-aminoimidazole alkaloids distributions in the marine sponge *Stylissa flabellata* via MALDI-Mass Spectrometry imaging.

Jennifer E. Yarnold,<sup>a</sup> Brett R. Hamilton,<sup>b</sup> David T. Welsh,<sup>a</sup> Gertruida F. Pool,<sup>b</sup> Deon J. Venter,<sup>b</sup>  
and Anthony R. Carroll\*<sup>a</sup>

<sup>a</sup> Environmental Futures Centre, Griffith University, Southport, Queensland, Australia. Fax: 07 555 29047; Tel: 07 555 29187;  
E-mail: [a.carroll@griffith.edu.au](mailto:a.carroll@griffith.edu.au)

<sup>b</sup> OMICS, Pathology, Mater Hospital Services, Brisbane Australia. Fax: 07 3163 8380; Tel: 07 3163 8338;  
E-mail: [deon.venter@mater.org.au](mailto:deon.venter@mater.org.au)

| Contents                                                                                                                                                                           | Pages |
|------------------------------------------------------------------------------------------------------------------------------------------------------------------------------------|-------|
| Figure S1. <sup>1</sup> H NMR spectrum of Sample 1 (Heron Island, G329565)                                                                                                         | S3    |
| Figure S2. <sup>1</sup> H NMR spectrum of Sample 3 (Lizard Island, G330843)                                                                                                        | S3    |
| Figure S3. <sup>1</sup> H NMR spectrum of Sample 4 (Lizard Island, G330940)                                                                                                        | S3    |
| Figure S4. <sup>1</sup> H NMR spectrum of Sample 2 (Lizard Island, G330956)                                                                                                        | S4    |
| Figure S5. (+) ESI-MS spectrum of <i>S. flabellata</i> MeOH extract for Sample 1.                                                                                                  | S4    |
| Figure S6. (+) ESI-MS spectrum of <i>S. flabellata</i> MeOH extract for Sample 2.                                                                                                  | S4    |
| Figure S7. (+) ESI-MS spectrum of <i>S. flabellata</i> MeOH extract for Sample 3.                                                                                                  | S5    |
| Figure S8. (+) ESI-MS spectrum of <i>S. flabellata</i> MeOH extract for Sample 4.                                                                                                  | S5    |
| Figure S9. MS-MS fragmentation spectra for dibromophakellin obtained directly off 20µm <i>S. flabellata</i> tissue ( <i>m/z</i> 390).                                              | S6    |
| Figure S10. Expanded MS-MS fragmentation spectra for dibromophakellin obtained directly off 20µm <i>S. flabellata</i> tissue ( <i>m/z</i> 390) showing major fragment ion peaks.   | S7    |
| Figure S11. MS-MS fragmentation spectra for sceptrin obtained directly off 20µm <i>S. flabellata</i> tissue ( <i>m/z</i> 621).                                                     | S8    |
| Figure S12. Expanded MS-MS fragmentation spectra for sceptrin obtained directly off 20µm <i>S. flabellata</i> tissue ( <i>m/z</i> 621) showing major fragment ion peaks.           | S9    |
| Figure S13. MS-MS fragmentation spectra for dibromopalau'amine obtained directly off 20µm <i>S. flabellata</i> tissue ( <i>m/z</i> 578).                                           | S10   |
| Figure S14. Expanded MS-MS fragmentation spectra for dibromopalau'amine obtained directly off 20µm <i>S. flabellata</i> tissue ( <i>m/z</i> 578) showing major fragment ion peaks. | S11   |
| Figure S15. MS-MS fragmentation spectra for a deoxygenated dibromopalau'amine obtained directly off 20µm <i>S. flabellata</i> tissue ( <i>m/z</i> 562).                            | S12   |

|                                                                                                                                                                                 |     |
|---------------------------------------------------------------------------------------------------------------------------------------------------------------------------------|-----|
| Figure S16. MS-MS fragmentation spectra for konbu'acidin B obtained directly off 20µm <i>S. flabellata</i> sections ( $m/z$ 825-835).                                           | S13 |
| Figure S17. Expanded MS-MS fragmentation spectra for konbu'acidin B obtained directly off 20µm <i>S. flabellata</i> sections ( $m/z$ 825-835) showing major fragment ion peaks. | S14 |
| Figure S18. MALDI-MS spectrum of EtOH spot extract for <i>S. flabellata</i> Sample 1.                                                                                           | S15 |
| Figure S19. MALDI-MS spectrum of EtOH spot extract for <i>S. flabellata</i> Sample 2.                                                                                           | S15 |
| Figure S20. MALDI-MS spectrum of EtOH spot extract for <i>S. flabellata</i> Sample 3.                                                                                           | S16 |
| Figure S21. MALDI-MS spectrum of EtOH spot extract for <i>S. flabellata</i> Sample 4.                                                                                           | S16 |
| Table S1. MALDI-MS spectrum of EtOH spot extract for <i>S. flabellata</i> Sample 4.                                                                                             | S17 |

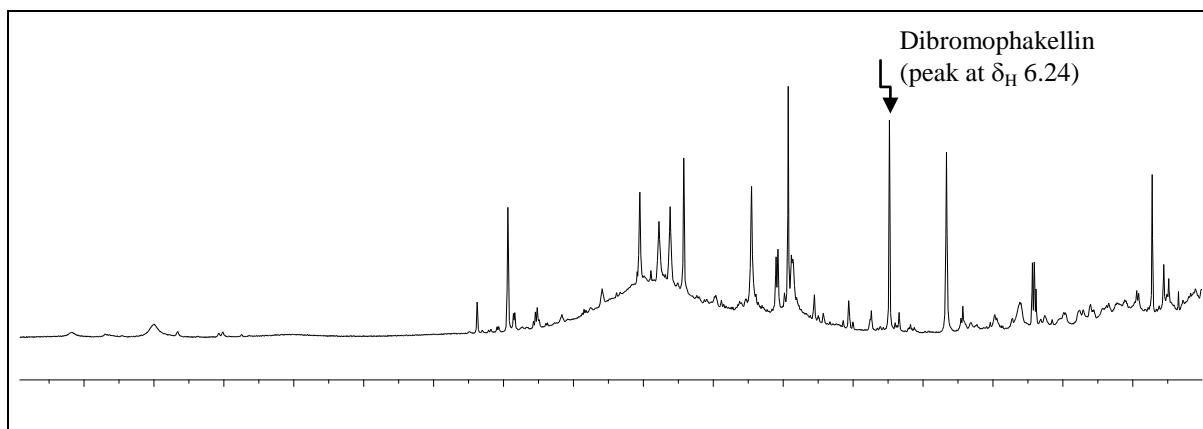

Figure S1. <sup>1</sup>H NMR spectrum of Sample 1 (Heron Island, G329565)

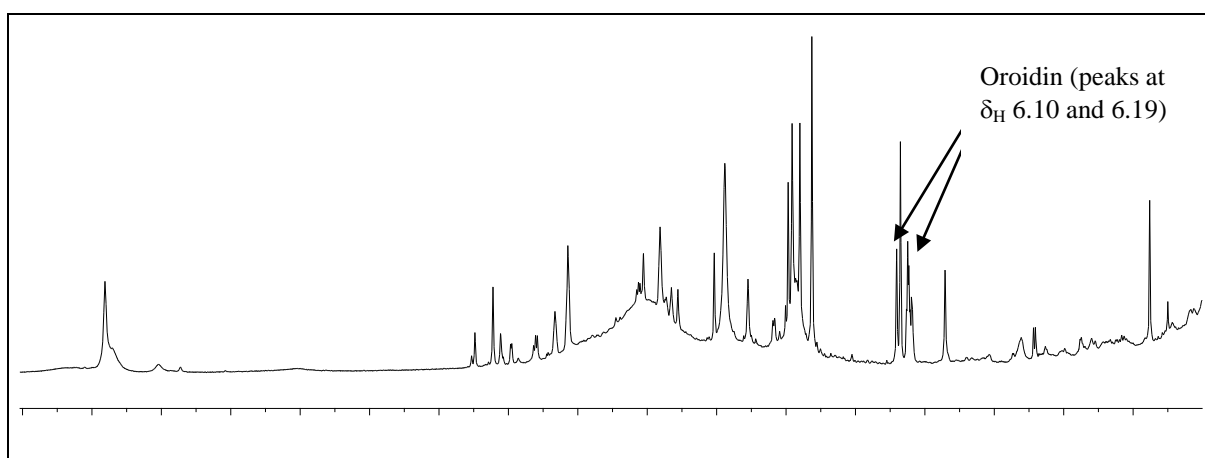

Figure S2. <sup>1</sup>H NMR spectrum of Sample 3 (Lizard Island, G330843)

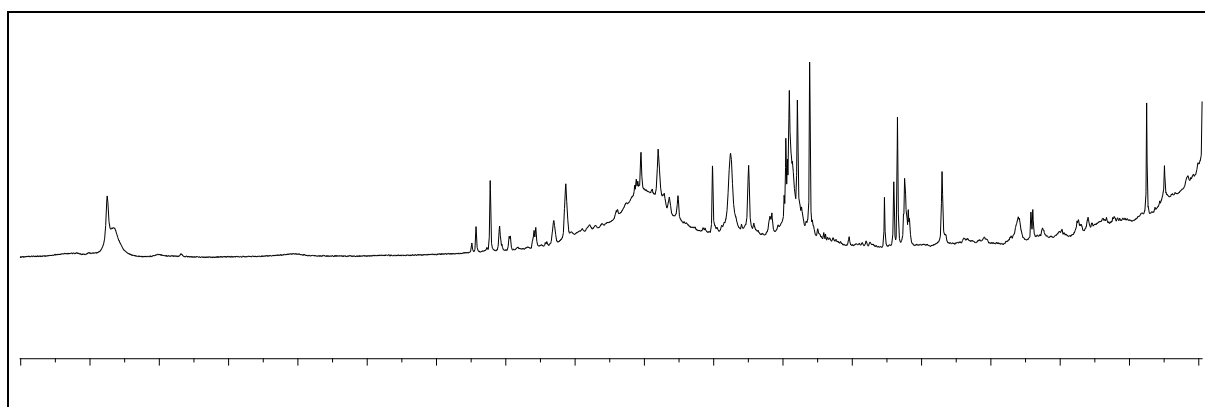

Figure S3. <sup>1</sup>H NMR spectrum of Sample 4 (Lizard Island, G330940)

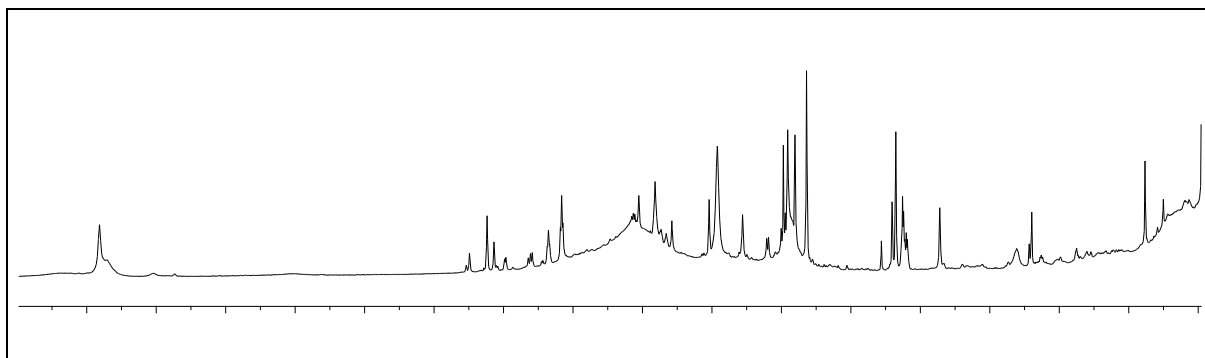

Figure S4. <sup>1</sup>H NMR spectrum of Sample 2 (Lizard Island, G330956)

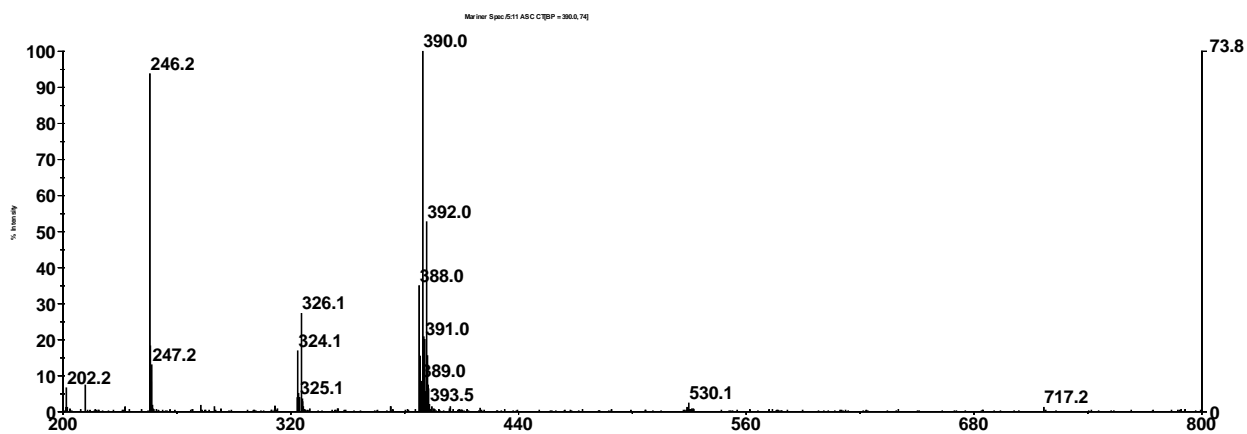

Figure S5. (+) ESI-MS spectrum of *S. flabellata* MeOH extract for Sample 1.

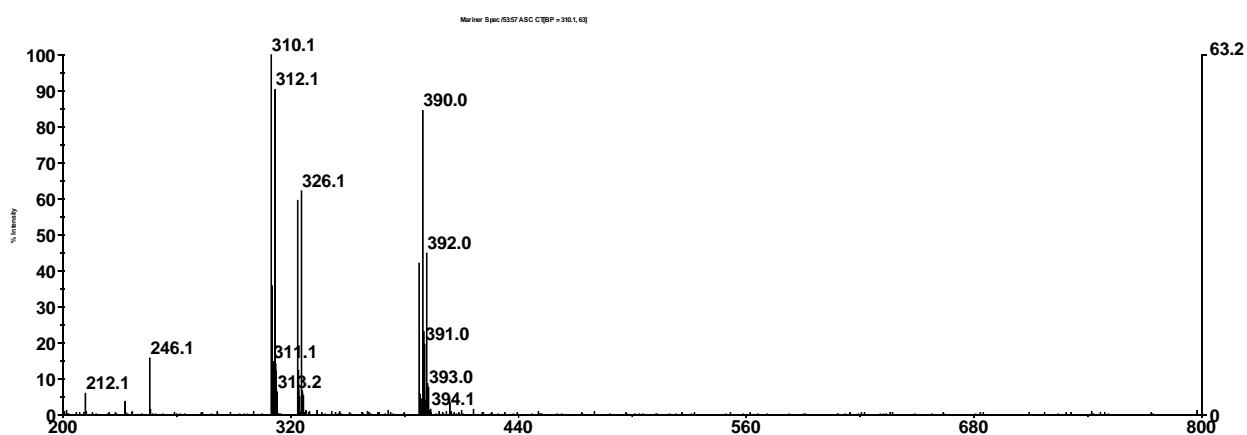

Figure S6. (+) ESI-MS spectrum of *S. flabellata* MeOH extract for Sample 2.

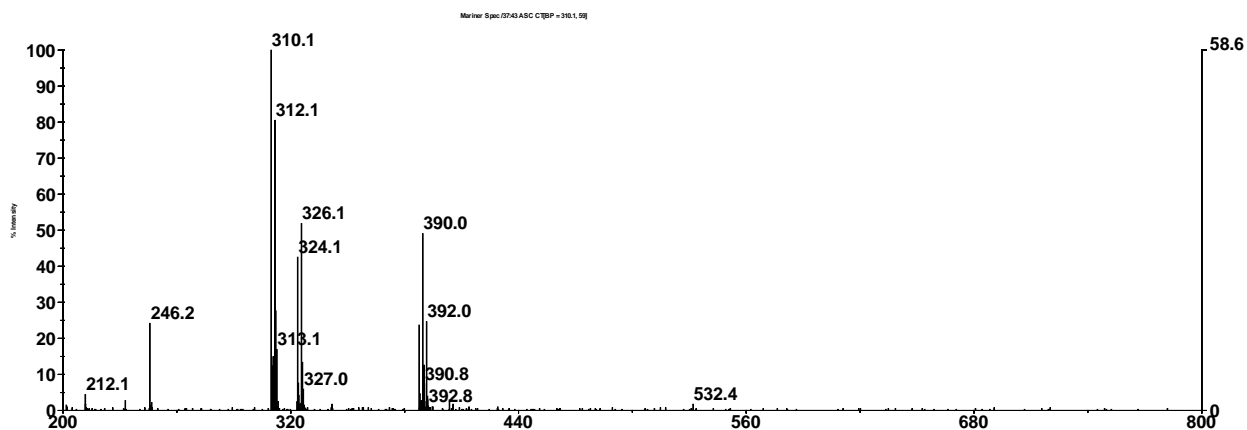

Figure S7. (+) ESI-MS spectrum of *S. flabellata* MeOH extract for Sample 3.

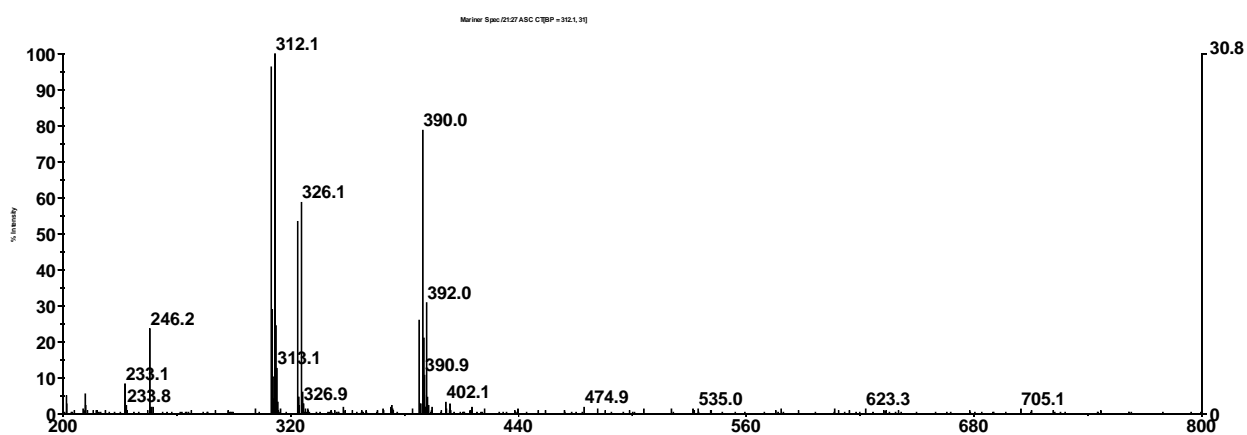

Figure S8. (+) ESI-MS spectrum of *S. flabellata* MeOH extract for Sample 4.

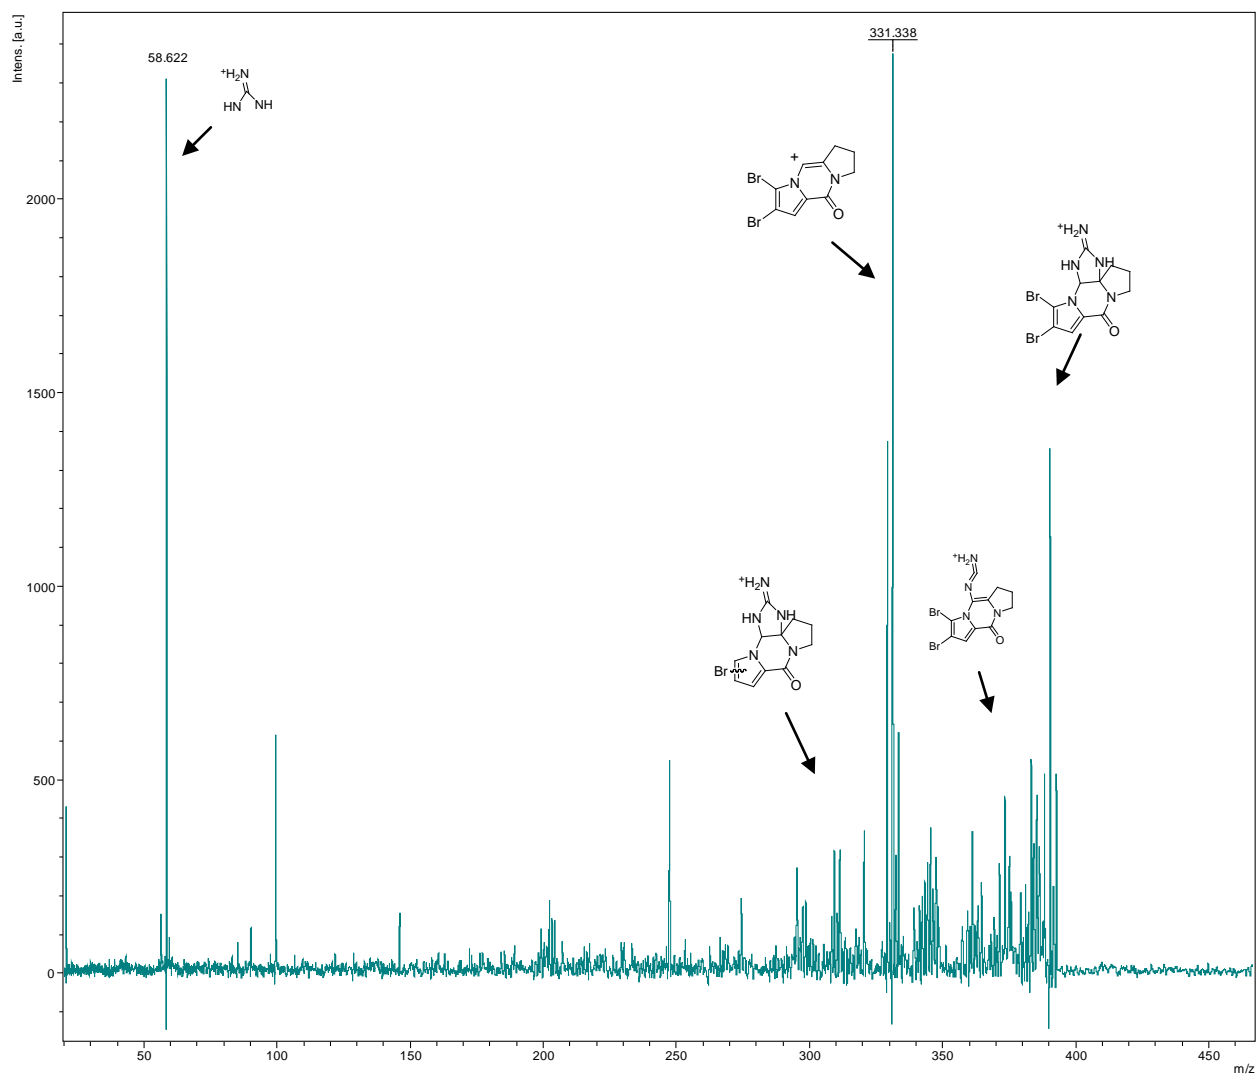

Figure S9. MS-MS fragmentation spectra for dibromophakellin obtained directly off 20 $\mu$ m *S. flabellata* tissue ( $m/z$  390).

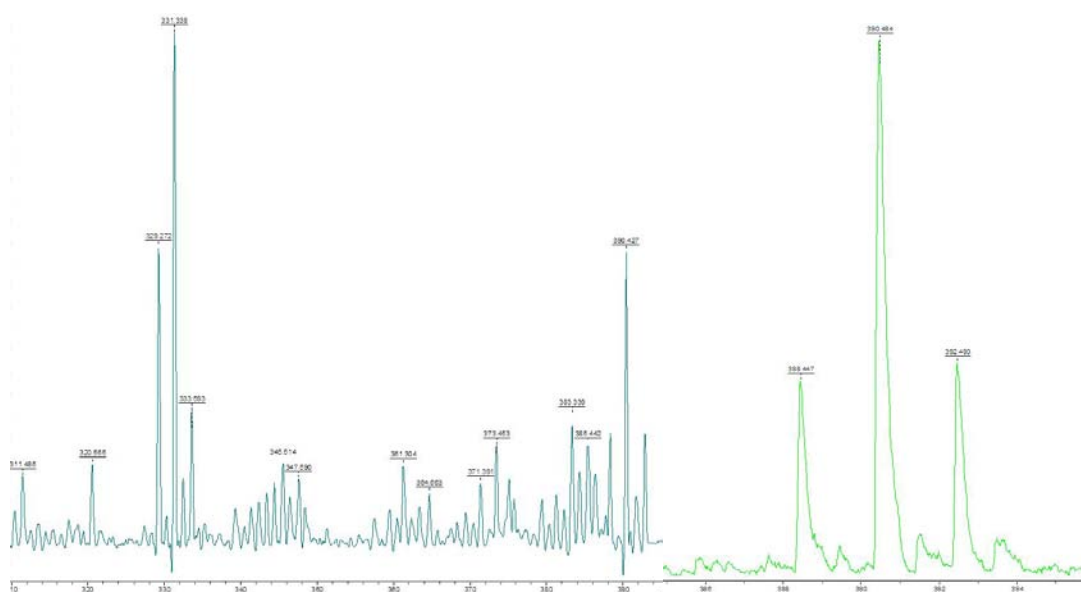

Figure S10. Expanded MS-MS fragmentation spectra for dibromophakellin obtained directly off  $20\mu\text{m}$  *S. flabellata* tissue ( $m/z$  390) showing major fragment ion peaks.

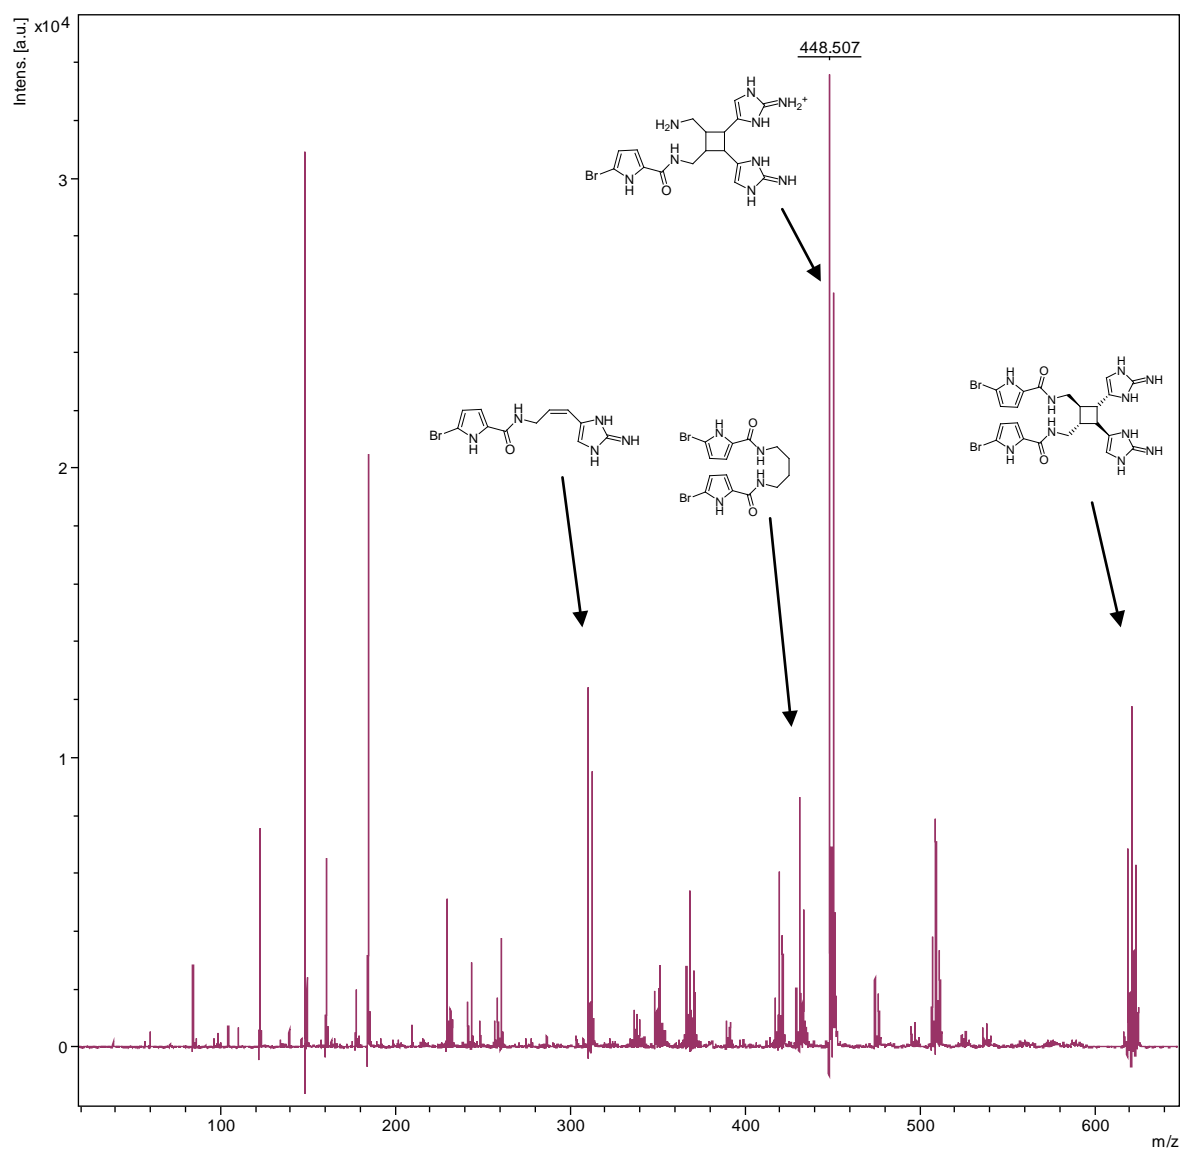

Figure S11. Full MS-MS fragmentation spectra for sceptrin obtained directly off 20 $\mu$ m *S. flabellata* tissue ( $m/z$  621).



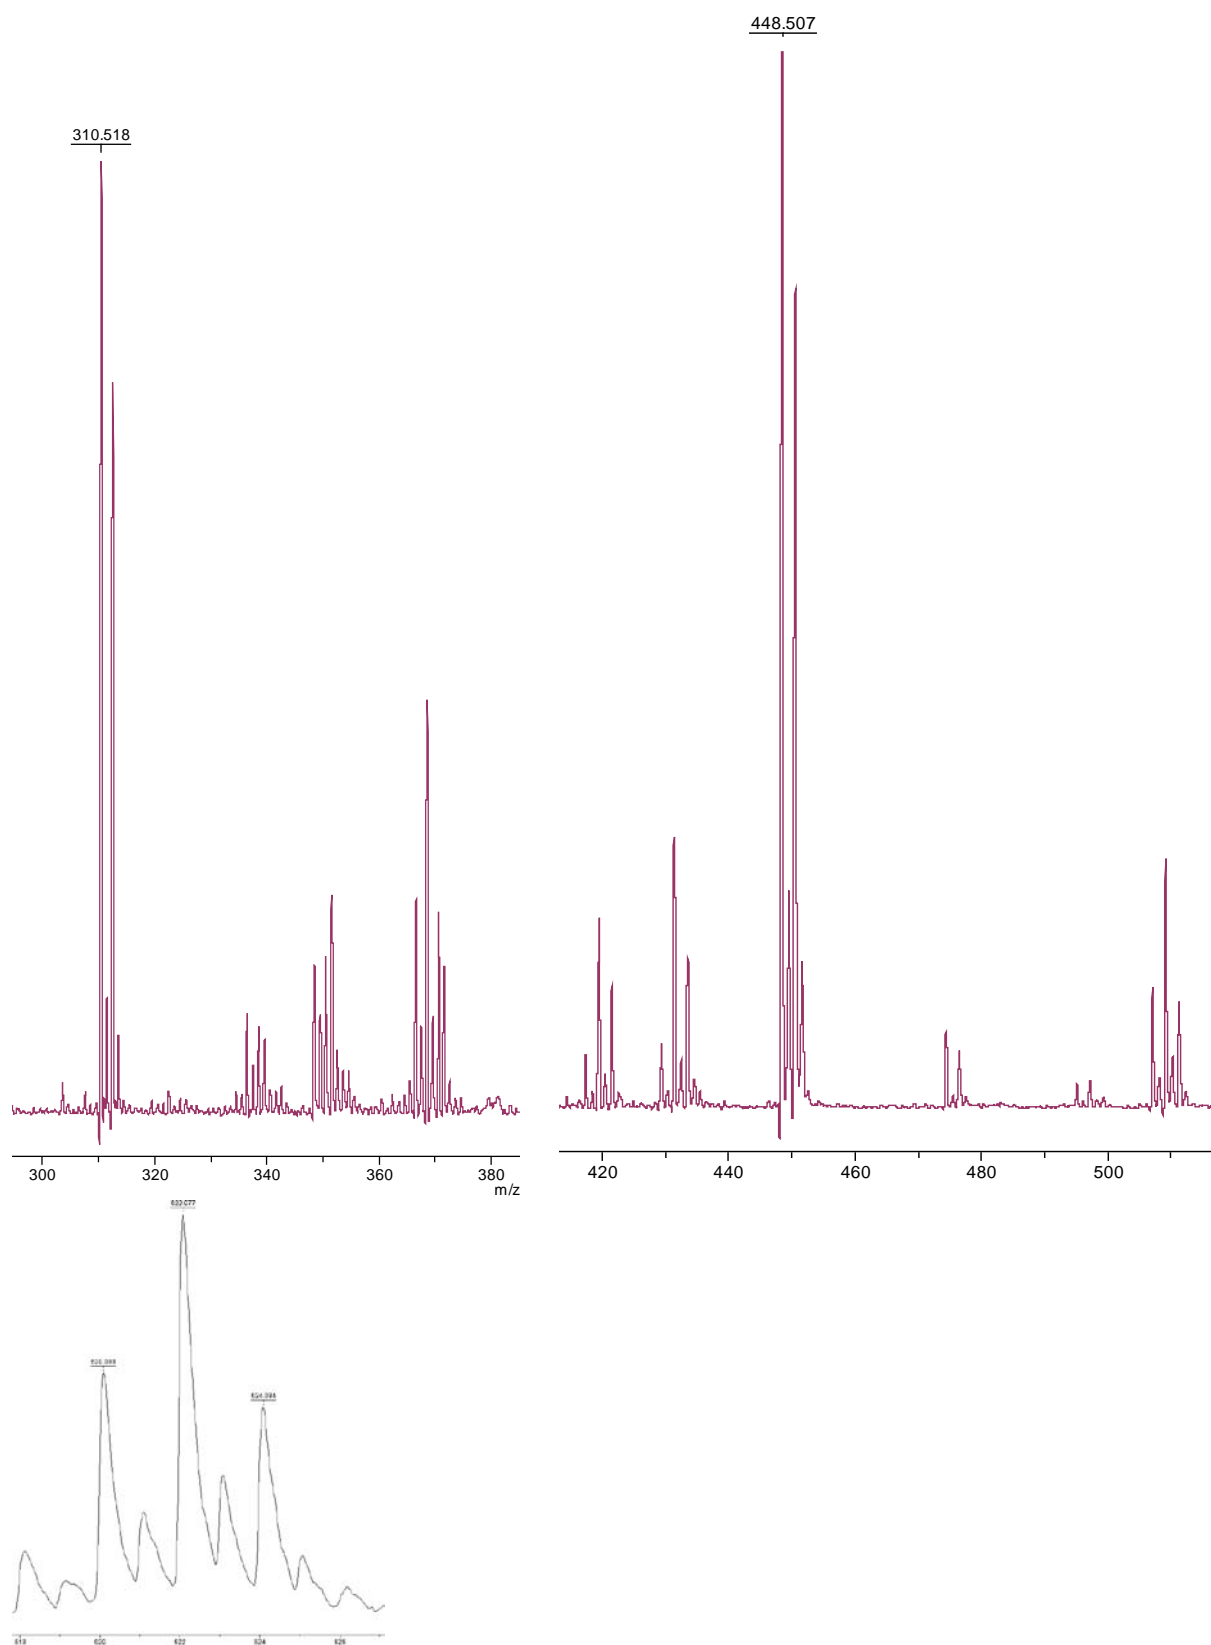

Figure S12. Expanded MS-MS fragmentation spectra for sceptrin obtained directly off 20µm *S. flabellata* tissue ( $m/z$  621) showing major fragment ion peaks.

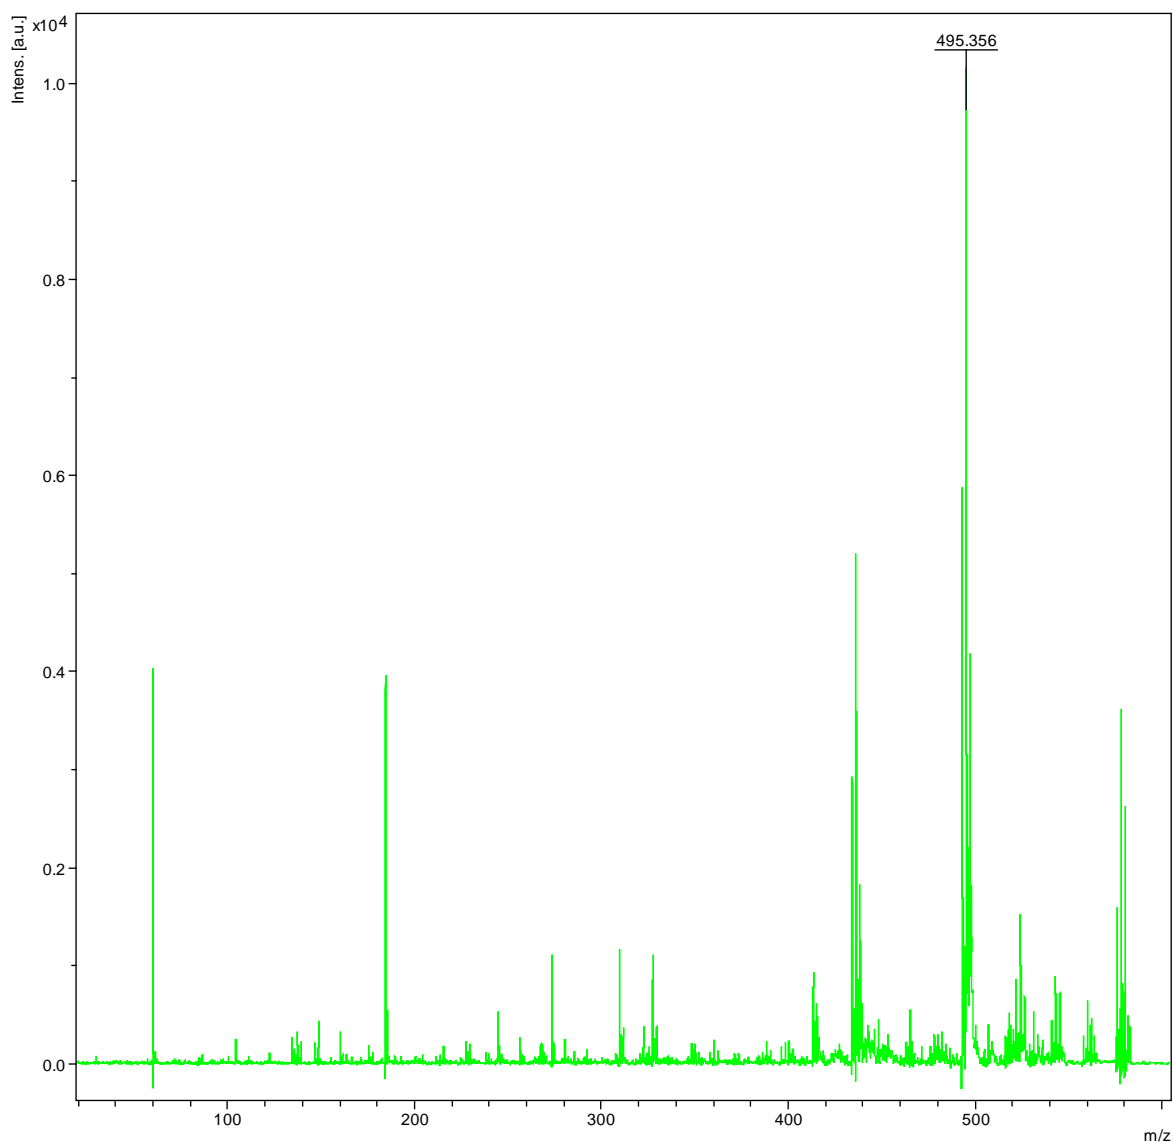

Figure S13. MS-MS fragmentation spectra for dibromopalau'amine obtained directly off  $20\mu\text{m}$  *S. flabellata* tissue ( $m/z$  578). MS/MS reported for palau'amine (R.B. Kinnel, H.-P. Gehrken, R. Swali, G. Skoropowski, P. J. Scheuer *J. Org. Chem.*, 1998, **63**, 3281-3286.):  $m/z$  **420**, **402**, **361**, **337**, **278**, 229, 94, 60. The peaks highlighted in bold are directly equivalent to 576/578/580, 558/560/562, 523,525,527, 493/495/497, 434/436/438 in dibromopalau'amine.

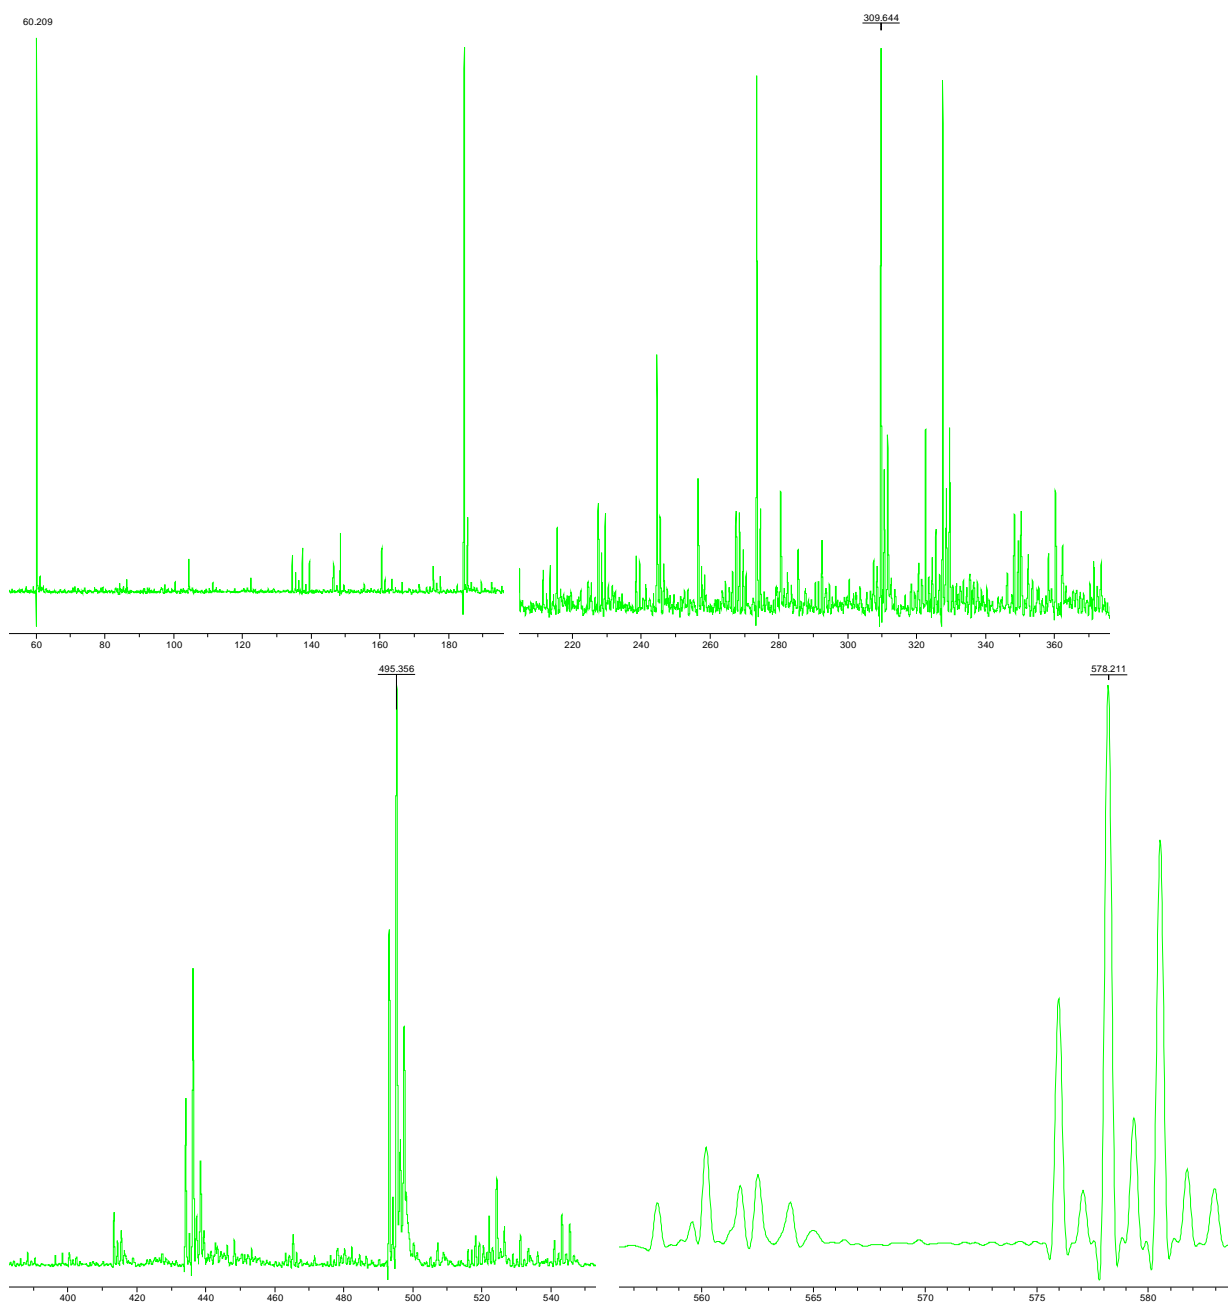

Figure S14. Expanded MS-MS fragmentation spectra for dibromopalau'amine obtained directly off 20 $\mu$ m *S. flabellata* tissue ( $m/z$  578) showing major fragment ion peaks.

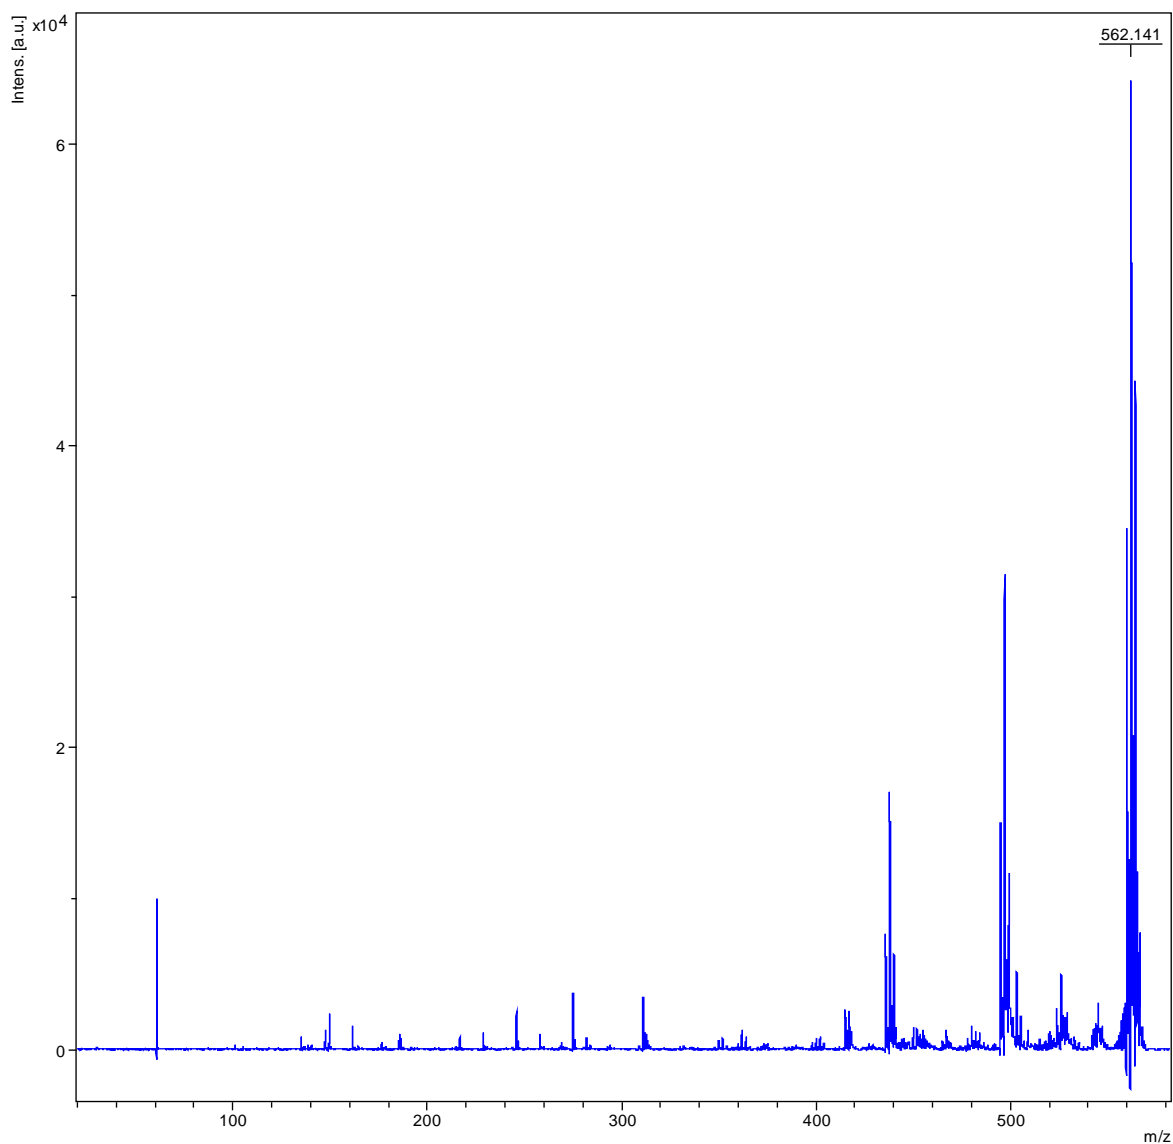

Figure S15. MS-MS fragmentation spectra for a possible deoxygenated dibromopalau'amine analogue obtained directly off 20 $\mu$ m *S. flabellata* tissue ( $m/z$  562). The major fragmentation pattern for this compound is similar to that observed for dibromopalau'amine suggesting a similar structure.

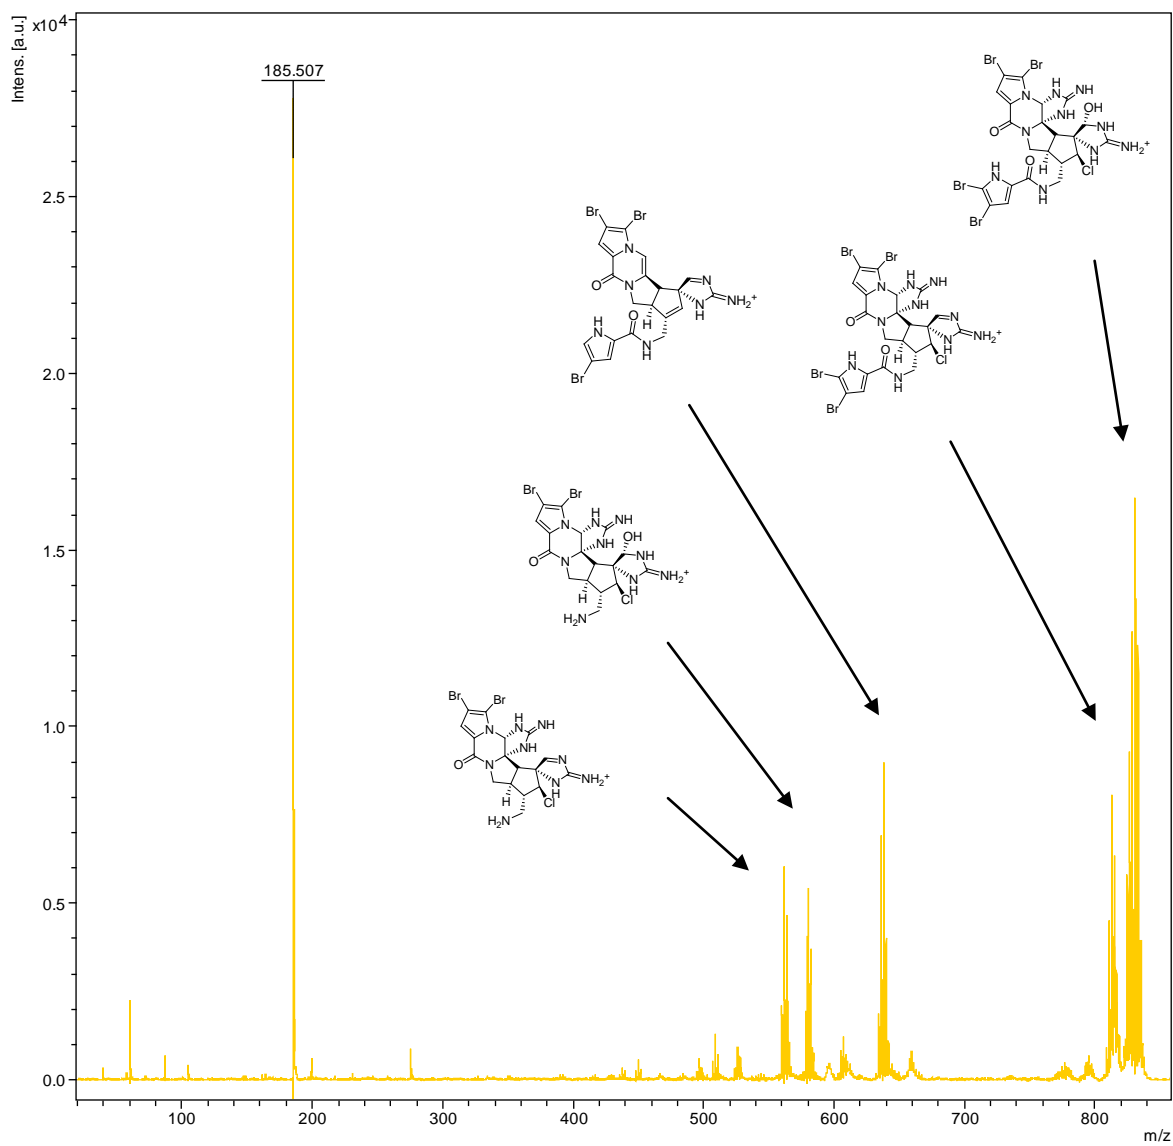

Figure S16. MS-MS fragmentation spectra for konbu'acidin B obtained directly off 20 $\mu$ m *S. flabellata* sections ( $m/z$  825-835).

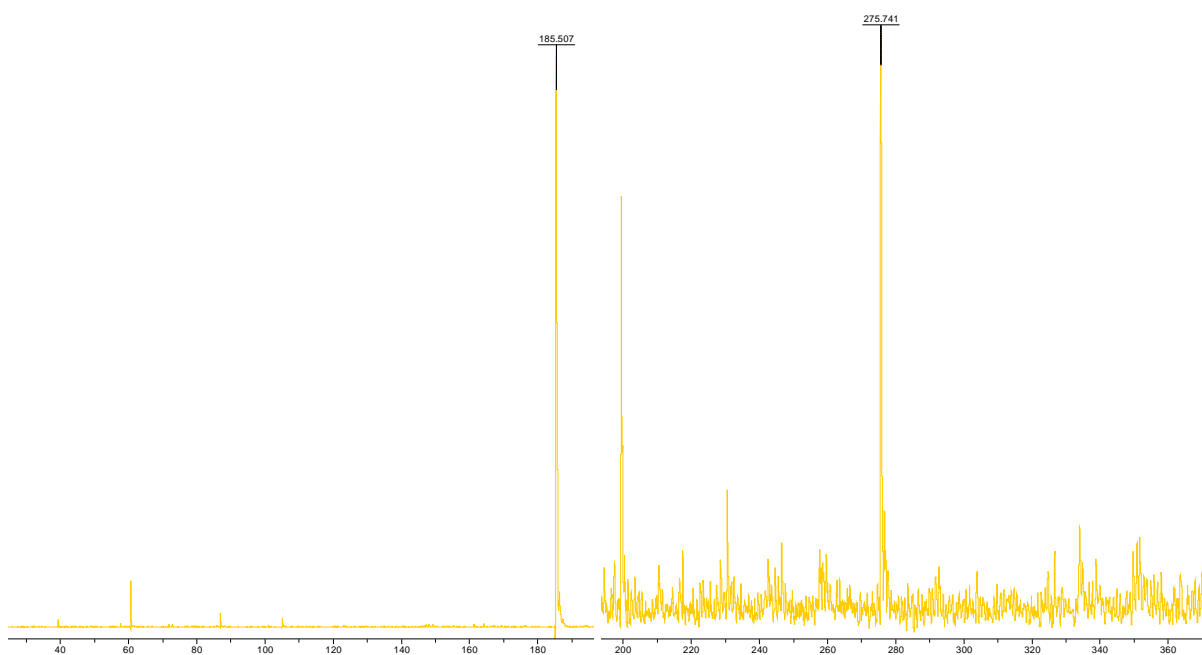

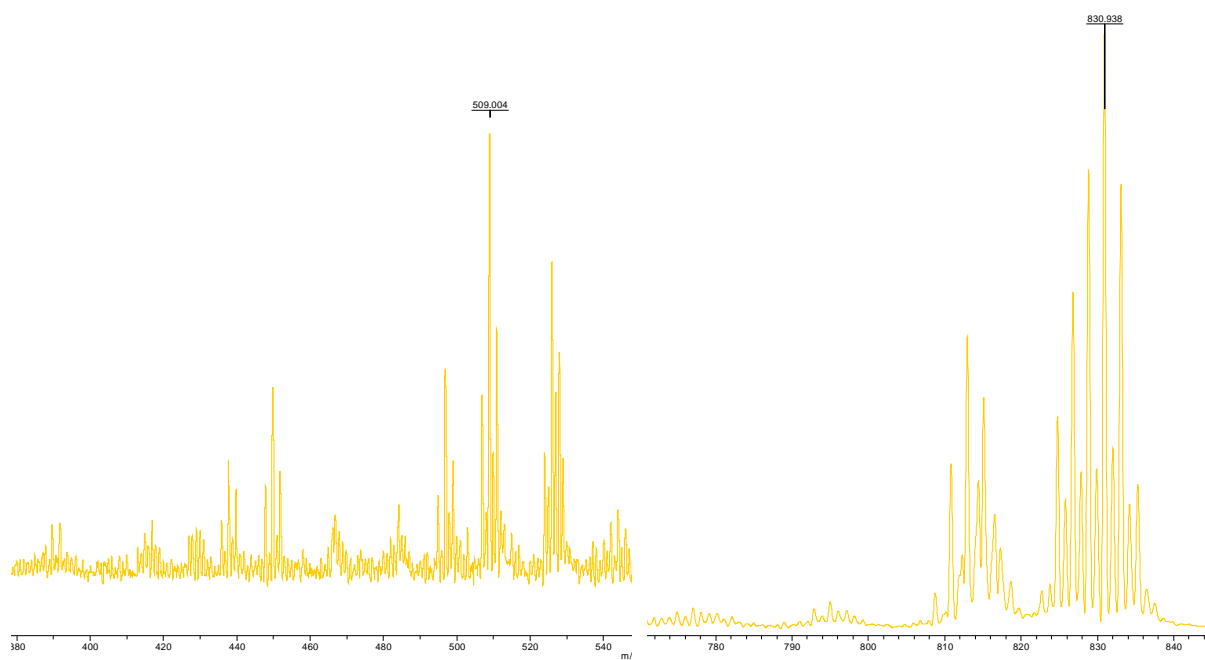

Figure S17. Expanded MS-MS fragmentation spectra for konbu'acidin B obtained directly off 20µm *S. flabellata* sections ( $m/z$  825-835) showing major fragment ion peaks.

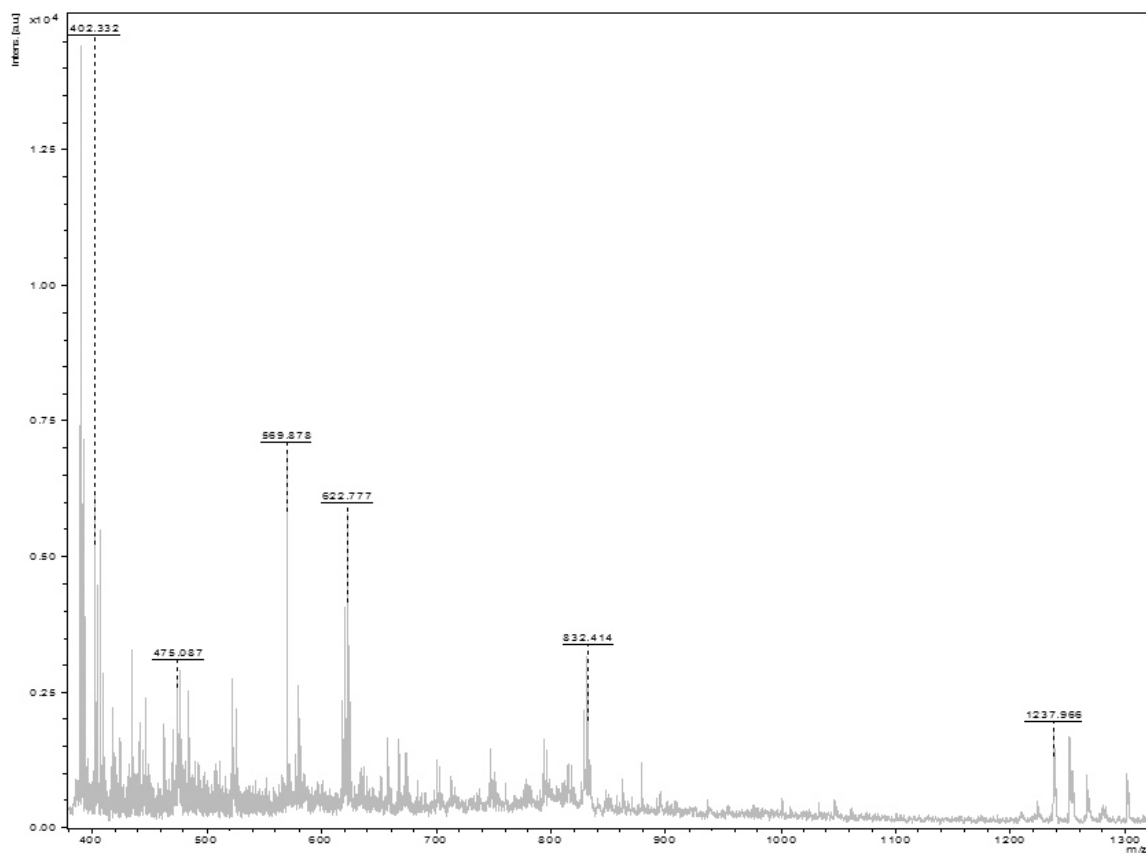

Figure S18. MALDI-MS spectrum of EtOH spot extract for *S. flabellata* Sample 1.

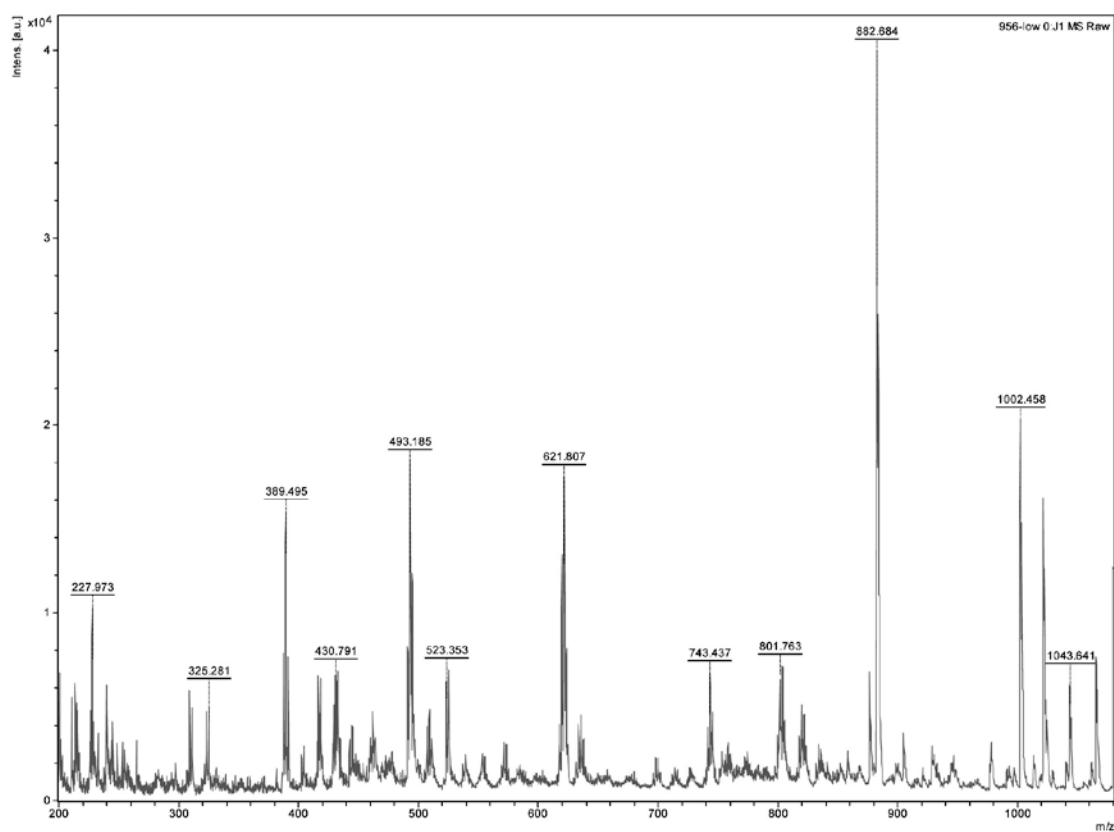

Figure S19. MALDI-MS spectrum of EtOH spot extract for *S. flabellata* Sample 2.

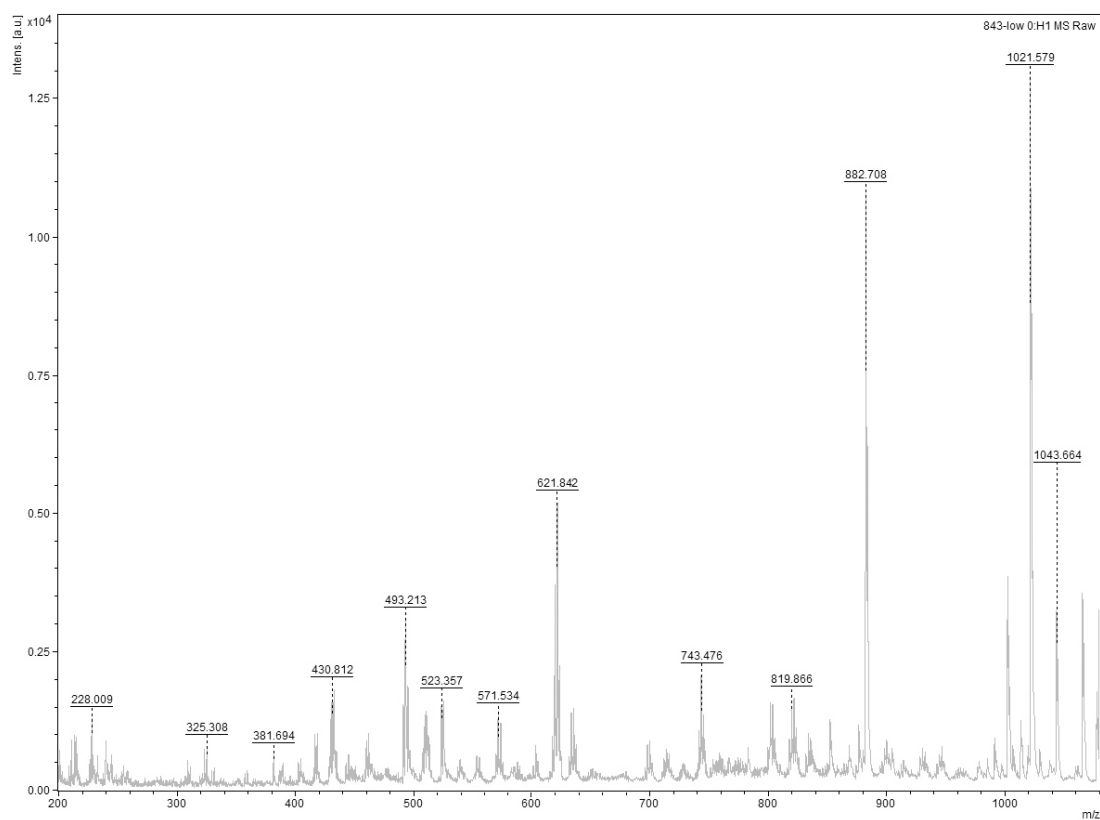

Figure S20. MALDI-MS spectrum of EtOH spot extract for *S. flabellata* Sample 3.

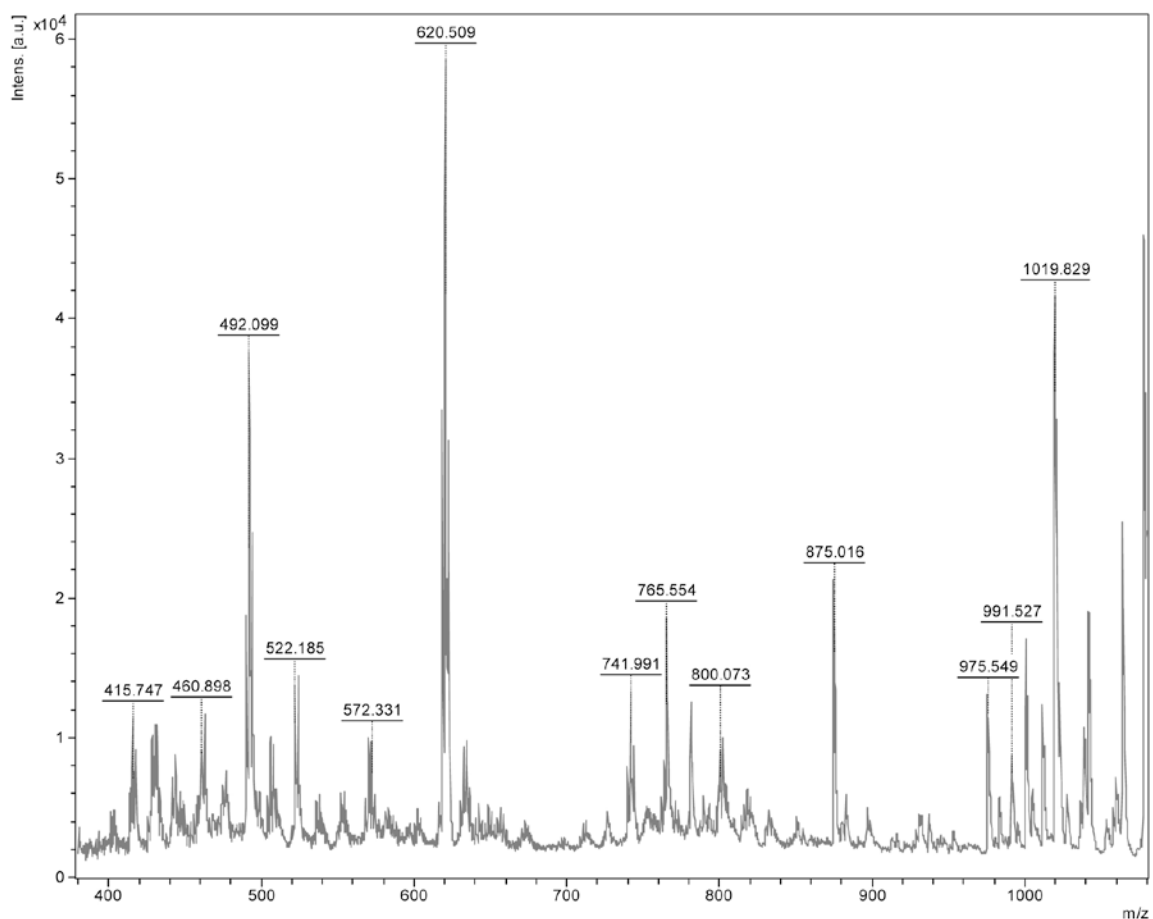

Figure S21. MALDI-MS spectrum of EtOH spot extract for *S. flabellata* Sample 4.

Table S1. Comparison of presence (+) or absence (-) of B-P-2-AIs detected in four *S. flabellata* specimens by MALDI-Imaging analysis.

| Compound Number | Compound                    | <i>m/z</i> peak                   | Sample 1<br>Heron Island<br>G329565 | Sample 2<br>Lizard Island<br>G330956 | Sample 3<br>Lizard Island<br>G330843 | Sample 4<br>Lizard Island<br>G330940 |
|-----------------|-----------------------------|-----------------------------------|-------------------------------------|--------------------------------------|--------------------------------------|--------------------------------------|
| 4               | Dibromophakellin            | 388 / 390 / 392                   | +                                   | +                                    | -                                    | -                                    |
|                 | Mono-brominated compound    | 414 / 416                         | +                                   | +                                    | +                                    | +                                    |
|                 | Mono-brominated compound    | 474 / 476                         | -                                   | -                                    | +                                    | +                                    |
|                 | Di-brominated compound      | 520 / 522 / 524                   | -                                   | +                                    | +                                    | +                                    |
|                 | Dibromopalau'amine analogue | 560 / 562 / 564                   | +                                   | -                                    | -                                    | -                                    |
| 5               | Dibromopalau'amine          | 576 / 578 / 580                   | +                                   | -                                    | -                                    | -                                    |
| 6               | Sceptrin                    | 619 / 621 / 623                   | +                                   | +                                    | +                                    | +                                    |
|                 | Tri-brominated compound     | 695 / 697 / 699 / 701             | +                                   | -                                    | -                                    | -                                    |
|                 | Di-brominated compound      | 741 / 743 / 745                   | +                                   | -                                    | -                                    | -                                    |
|                 | Konbu'acidin B              | 825 / 827 / 829 / 831 / 833 / 835 | +                                   | -                                    | -                                    | -                                    |
